# Supplementary material for: Response surface methodology to optimise the heat-assisted aqueous extraction of phenolic compounds from coffee parchment and their comprehensive analysis
Source: Royal Society of Chemistry journal article supplement (doi:10.1039/c9fo00544g), 2019-01-01
Supplement: c9fo00544g1.pdf [file c9fo00544g1.pdf]

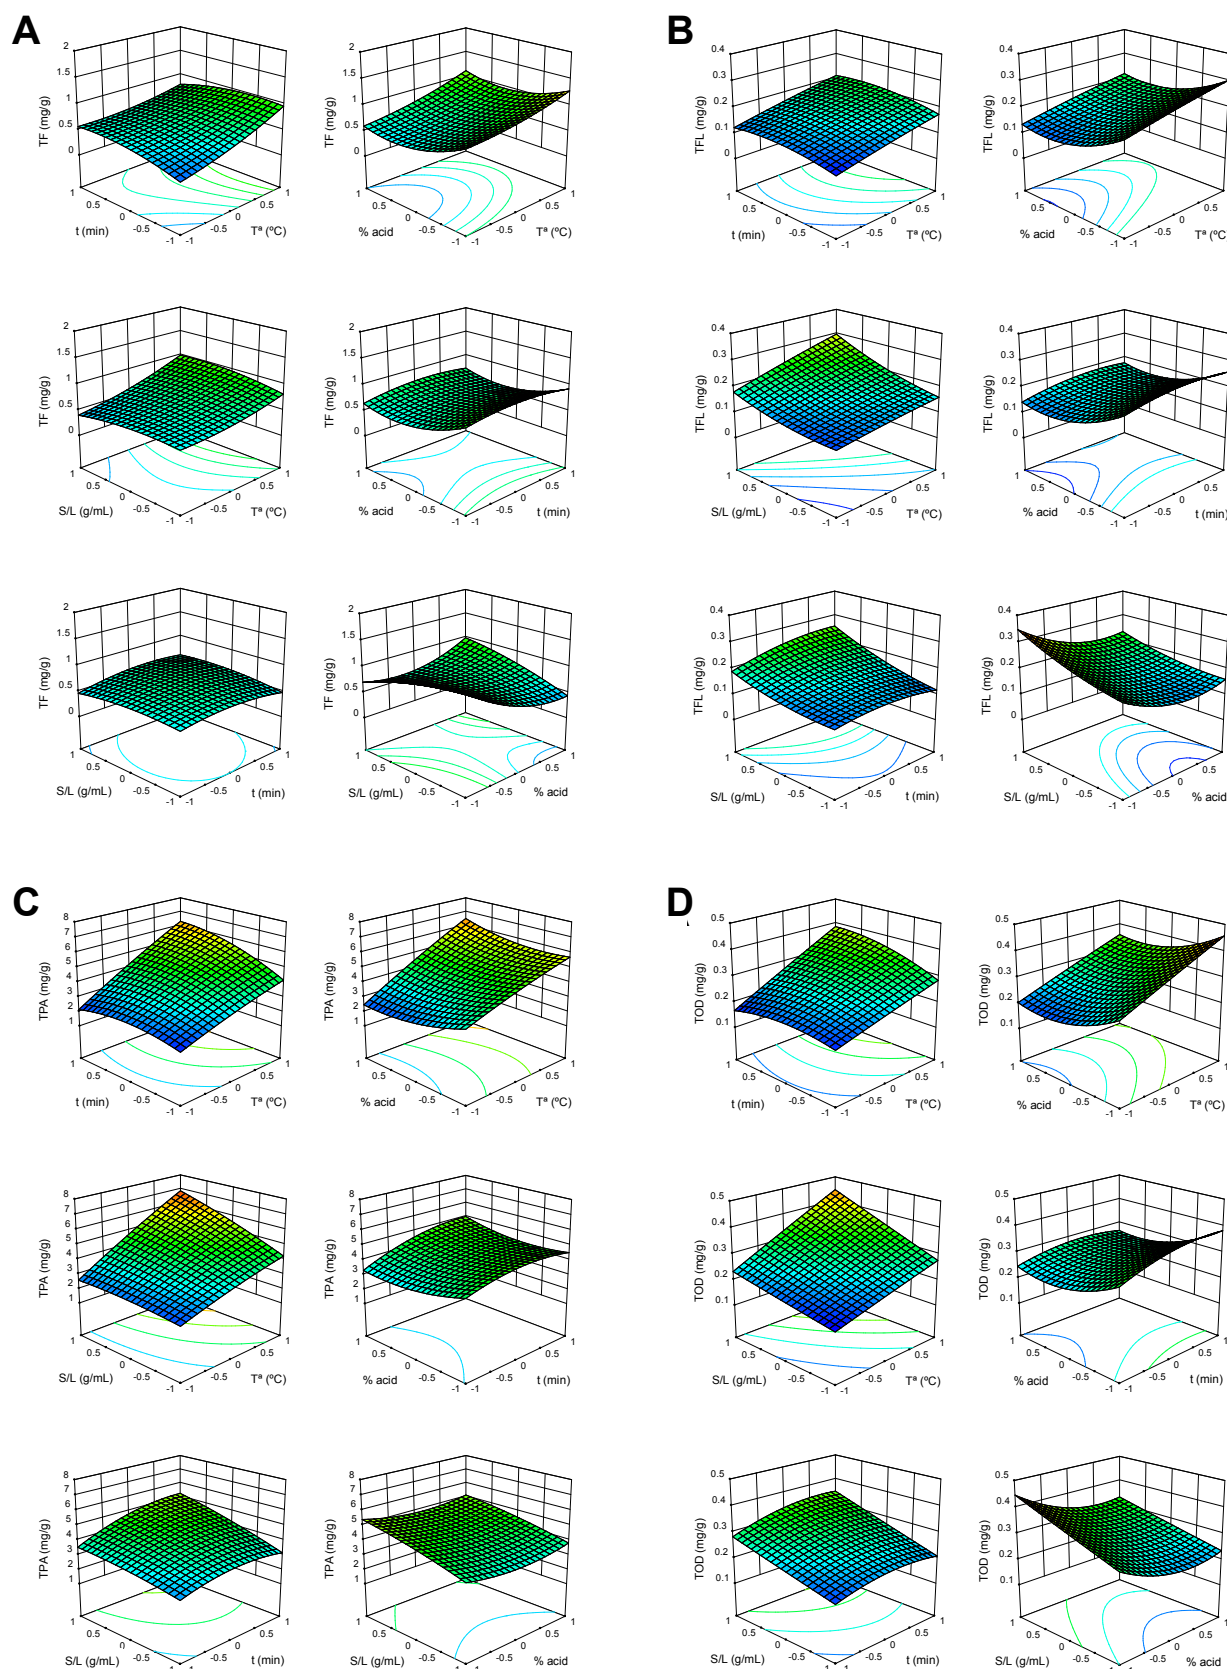

**Supplementary Figure 1.** 3D plots depicting the behaviour of response variables (A) total flavonoids (TF), (B) total flavanols (TFL), (C) total phenolic acids (TPA), (D) total *ortho*-diphenols (TOD), under different conditions of extraction. Responses (mg g<sup>-1</sup>) are plotted against two paired variables:  $T^{\circ}$  (temperature in °C), acidity (% citric acid), t (time in min) and S/L (solid-to-solvent ratio in g mL<sup>-1</sup>).
